# Supplementary material
Source: publisher figshare collection journal article supplement (https://aacr.figshare.com/articles/dataset/_/22430326)
Supplement: Supplementary file 1 [file 39876658]

## Supplemental Materials

Table 1: Complete list of flow cytometry antibodies

| Target       | Species | Clone     | Fluorophore      | Manufacturer   |
|--------------|---------|-----------|------------------|----------------|
| CD45         | Human   | HI10      | AF488            | Biolegend      |
| CCR4         | Human   | L291H4    | PE               | Biolegend      |
| CCR4         | Human   | L291H4    | BV510            | Biolegend      |
| CD16         | Human   | 3G8       | AF647            | Biolegend      |
| CD8a         | Human   | SK1       | PerCP-eFluor 710 | Thermo Fisher  |
| CD56         | Human   | CMSSB     | PE-eFluor 610    | Thermo Fisher  |
| FOXP3        | Human   | 236A/E7   | PE-Cy7           | Thermo Fisher  |
| CCR8         | Human   | 433H      | BV421            | BD Biosciences |
| CD15         | Human   | W6D3      | BV510            | BD Biosciences |
| CD4          | Human   | SK3       | BV650            | BD Biosciences |
| CD4          | Human   | SK3       | BV605            | BD Biosciences |
| CTLA4        | Human   | BNI3      | BV421            | BD Biosciences |
| HLA-DR       | Human   | G46-6     | BUV395           | BD Biosciences |
| PD-1         | Human   | EH12.1    | BUV737           | BD Biosciences |
| CD3          | Human   | UCHT1     | BUV805           | BD Biosciences |
| CD3          | Human   | UCHT1     | APC              | BD Biosciences |
| CD39         | Human   | A1        | BV786            | Biolegend      |
| Granzyme B   | Human   | QA16A02   | PE               | Biolegend      |
| IFN $\gamma$ | Human   | 4S.B3     | PE-eFluor 610    | Thermo Fisher  |
| IL-1R2       | Human   | MA5-23626 | APC              | Thermo Fisher  |
| IL-2         | Human   | MQ1-17H12 | BUV737           | BD Biosciences |
| CD19         | Human   | SJ25C1    | BV510            | BD Biosciences |
| CD25         | Human   | 2A3       | APC-R700         | BD Biosciences |
|              |         |           |                  |                |
| CD3e         | Mouse   | 145-2C11  | BV421            | Biolegend      |
| CCR8         | Mouse   | SA214G2   | AF647            | Biolegend      |
| CCR8         | Mouse   | SA214G2   | PE               | Biolegend      |
| IFN $\gamma$ | Mouse   | XMG1.2    | PE-Cy7           | Biolegend      |
| TNF $\alpha$ | Mouse   | MP6-XT22  | APC              | Biolegend      |
| FOXP3        | Mouse   | FJK-16a   | PE-eFluor 610    | Thermo Fisher  |
| CD8a         | Mouse   | 53-6.7    | BUV805           | BD Biosciences |
| CD8b         | Mouse   | H35-17.2  | BV650            | BD Biosciences |
| CD4          | Mouse   | RM4-4     | BV786            | BD Biosciences |
| CD4          | Mouse   | RM4-5     | BV786            | BD Biosciences |

|                              |       |        |        |                |
|------------------------------|-------|--------|--------|----------------|
| CD45                         | Mouse | 30-F11 | BUV395 | BD Biosciences |
| CD90.1                       | Mouse | OX-7   | BB700  | BD Biosciences |
| CD90.2                       | Mouse | 30-H12 | BV421  | Biolegend      |
| CD45.2                       | Mouse | 104    | APC    | Biolegend      |
| CD45.1                       | Mouse | A20    | BUV395 | BD Biosciences |
| Fixable Viability Stain 575V | NA    | NA     | NA     | BD Biosciences |

## Supplemental Methods

*Human PBMC isolation.* Whole blood was collected in EDTA or sodium heparin tubes. Blood was diluted 1:1 with HBSS (Corning). Ficoll-Paque (GE Healthcare) was added to a SepMate tube (STEMCELL Technologies) for density gradient separation. Supernatant containing the separated PBMCs was collected and washed for assay use.

*Human spleen processing.* Donated human spleen (CHTN) from a 39 year old woman was shipped overnight on 4°C. The spleen was mashed through a metal mesh filter to generate single cell suspensions and cryopreserved.

*Anti-human antibody generation.* Mice were immunized with peptide representing amino acids 1-35 of human CCR8 conjugated to keyhole limpet hemocyanin (KLH) carrier protein, plasma membrane enriched fractions from human CCR8 overexpressing cells, or a combination of both. Hybridoma cells were created with spleen and lymph node suspensions with P3X63AgU.1 myeloma cells (ATCC CRL-1597) by electrofusion (BTX Hybrimune System). Supernatants from hybridomas were screened for CCR8 binding on cells. Hybridoma cells were plated in semi-solid media (Medium D, STEMCELL Technologies) and monoclonal colonies were picked using the ClonePix2 system (Molecular Devices). DNA sequences encoding for the antibody heavy and light chains were obtained via Sanger sequencing. Anti-human CCR4, a mogamulizumab biosimilar, was derived from publicly available DNA sequence.
